# Supplementary material for: Foxa2 attenuates steatosis and inhibits the NF-κB/IKK signaling pathway in nonalcoholic fatty liver disease
Source: PeerJ journal article supplement (doi:10.7717/peerj.16466), 2023-12-07
Supplement: Revised_Raw_data.zip [file Revised_Raw_data.zip]

## Sheet: A-WB
Foxa2	Gray value	Relative quantification	Avg	sd	GAPDH	Normalized processing
Control	16419.1	0.51906	0.588852	0.0497252	31632.3	0.881477
	19573.7	0.616287			31760.8	1.04659
	19959.2	0.63121			31620.5	1.07193
OA	8296.72	0.264517	0.278445	0.0397519	31365.6	0.449208
	8150.65	0.23824			34211.9	0.404584
	11022.4	0.332577			33142.5	0.564788
OA+oe-NC	8496.92	0.26429	0.324743	0.0450093	32149.9	0.448823
	12268.4	0.372228			32959.3	0.632124
	10887.3	0.337711			32238.3	0.573508
OA+oe-Foxa2	36327.8	1.19928	1.16257	0.059022	30291.2	2.03664
	35858.8	1.20914			29656.3	2.05339
	33076.9	1.0793			30646.7	1.83289

## Sheet: B-Q-PCR
分组	GAPDH(Ct)	GAPDH（Ct）mean	Foxa2(Ct)	Foxa2(Ct)mean	△Ct	-△△Ct	Foxa2 Relative expression level(2-△△Ct)	△Ct	-△△Ct	Foxa2 Relative expression level(2-△△Ct)
Control	17.54	17.6967	24.08	24.0267	6.33	0	1	6.54	-0.21	0.864537
	17.82		23.9					6.08	0.25	1.18921
	17.73		24.1					6.37	-0.04	0.972655
OA	17.61	17.4933	25.61	25.31	7.81667	-1.48667	0.356836	8	-1.67	0.314253
	17.24		25.24					8	-1.67	0.314253
	17.63		25.08					7.45	-1.12	0.460094
OA+oe-NC	17.61	17.7367	25.61	25.39	7.65333	-1.32333	0.399611	8	-1.67	0.314253
	17.81		25.52					7.71	-1.38	0.384219
	17.79		25.04					7.25	-0.92	0.528509
OA+oe-Foxa2	17.9	17.86	23.37	23.2633	5.40333	0.926667	1.90088	5.47	0.86	1.81504
	17.92		23.24					5.32	1.01	2.01391
	17.76		23.18					5.42	0.91	1.87905

## Sheet: C-lipid content
			OD490
		Control	0.12
			0.18
			0.1
		OA	1.11
			1.03		ì
			1.09
		OA+oe-NC	0.96
			1.1
			1.04
		OA+oe-Foxa2	0.87
			0.75
			0.72

## Sheet: D-TG
		1	2	3	4	5	6	7
		0	7.8125	15.625	31.25	62.5	125	250	μmol/L
		0.037	0.231	0.309	0.413	0.634	1.014	1.836
			C(μmol/L)	C*10	Protein concentration（mg/ml）	μmol/g
	Control	0.603	64.8088	648.088	2.88485	224.652
		0.321	23.3382	233.382	2.53602	92.0271
		0.386	32.8971	328.971	2.67555	122.954
	OA	1.134	142.897	1428.97	2.3616	605.086
		1.326	171.132	1711.32	2.50113	684.219
		1.443	188.338	1883.38	2.49241	755.646
	OA+oe-NC	1.317	169.809	1698.09	2.27439	746.612
		1.288	165.544	1655.44	2.66683	620.753
		1.426	185.838	1858.38	2.50985	740.434
	OA+oe-Foxa2	0.899	108.338	1083.38	2.50113	433.157
		0.928	112.603	1126.03	2.53602	444.015
		1.039	128.926	1289.26	2.44009	528.368

## Sheet: D-TC
		1	2	3	4	5	6	7
		0	78	156	312.5	625	1250	2500	μmol/L
		0.044	0.254	0.328	0.442	0.625	1.011	1.892
			C(μmol/L)	Protein concentration（mg/ml）	μmol/g
	Control	0.712	772.429	2.88485	267.753
		0.607	622.429	2.53602	245.435
		0.731	799.571	2.67555	298.844
	OA	1.486	1878.14	2.3616	795.284
		1.412	1772.43	2.50113	708.65
		1.499	1896.71	2.49241	760.995
	OA+oe-NC	1.506	1906.71	2.27439	838.34
		1.534	1946.71	2.66683	729.973
		1.601	2042.43	2.50985	813.764
	OA+oe-Foxa2	1.167	1422.43	2.50113	568.714
		1.092	1315.29	2.53602	518.642
		1.22	1498.14	2.44009	613.971

## Sheet: E-WB
FAS	Gray value	Relative quantification	Avg	sd	GAPDH	Normalized processing
Control	23542	0.808814	0.757318	0.0620698	29106.8	1.068
	19880.4	0.670006			29672	0.884709
	22770.8	0.793134			28710	1.04729
OA	34998.1	1.11945	1.15623	0.0395036	31263.5	1.47818
	36044.1	1.21104			29763	1.59911
	34523.4	1.13819			30331.8	1.50292
OA+oe-NC	33546.8	1.13864	1.2107	0.0582711	29462.3	1.50351
	37460.1	1.2121			30905.1	1.60052
	38485.3	1.28135			30035	1.69196
OA+oe-Foxa2	28360.6	0.967647	0.936293	0.0564978	29308.9	1.27773
	28955.8	0.984262			29418.8	1.29967
	25947	0.856971			30277.6	1.13159
ACC	Gray value	Relative quantification	Avg	sd	GAPDH	Normalized processing
Control	11860.8	0.407493	0.414567	0.0385368	29106.8	0.982937
	13794.6	0.464903			29672	1.12142
	10660.2	0.371306			28710	0.895646
OA	32826.4	1.04999	1.09918	0.0420117	31263.5	2.53274
	34305.9	1.15263			29763	2.78033
	33211.1	1.09493			30331.8	2.64113
OA+oe-NC	34384.7	1.16707	1.13285	0.0363564	29462.3	2.81516
	33455	1.08251			30905.1	2.61117
	34509.1	1.14896			30035	2.77147
OA+oe-Foxa2	21964.7	0.749421	0.807251	0.0464148	29308.9	1.80772
	25390.1	0.86306			29418.8	2.08183
	24502.8	0.809272			30277.6	1.95209
CPT1α	Gray value	Relative quantification	Avg	sd	GAPDH	Normalized processing
Control	45657.9	1.56863	1.45395	0.100801	29106.8	1.07887
	39264.5	1.32328			29672	0.910126
	42202.1	1.46995			28710	1.011
OA	23182.6	0.741523	0.823641	0.078721	31263.5	0.510004
	23798.6	0.799601			29763	0.549949
	28202.5	0.9298			30331.8	0.639497
OA+oe-NC	28073.3	0.952858	0.878637	0.10509	29462.3	0.655356
	22561.3	0.730018			30905.1	0.502091
	28624.4	0.953036			30035	0.655478
OA+oe-Foxa2	35576.4	1.21384	1.17089	0.0488757	29308.9	0.834856
	32434.5	1.10251			29418.8	0.758285
	36221.3	1.19631			30277.6	0.822796
