# Supplementary figures and images for: Foxa2 attenuates steatosis and inhibits the NF-κB/IKK signaling pathway in nonalcoholic fatty liver disease
Source: PeerJ journal article supplement (doi:10.7717/peerj.16466), 2023-12-07

**C**

**HE**

Control

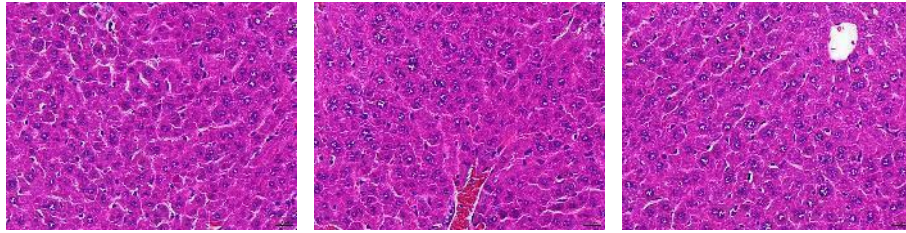

HFD

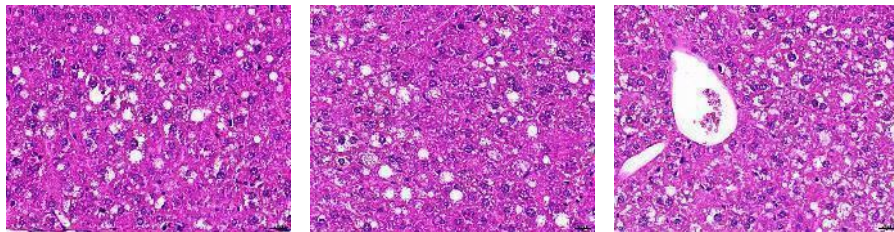

HFD + oe-NC

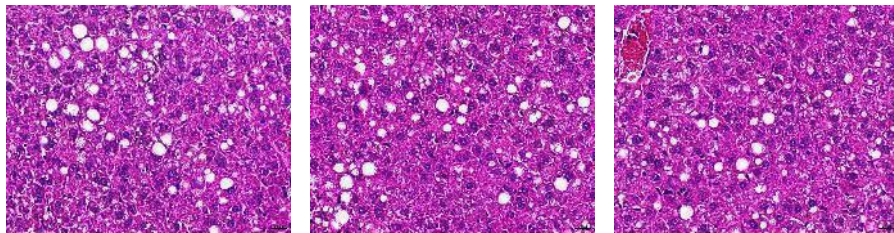

HFD + oe-Foxa2

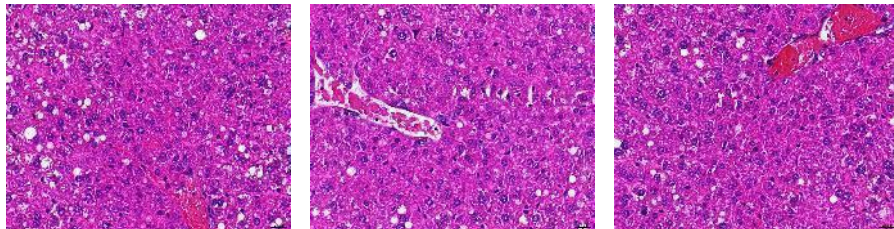

## Oil Red O

Control

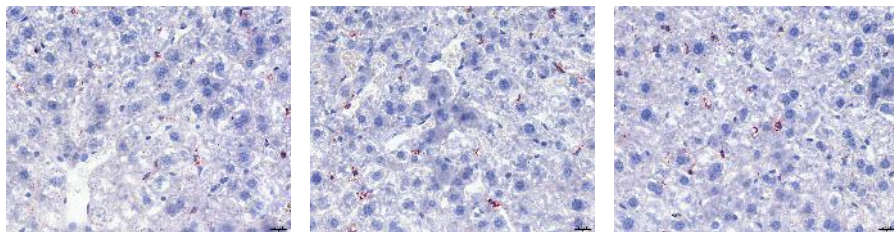

HFD

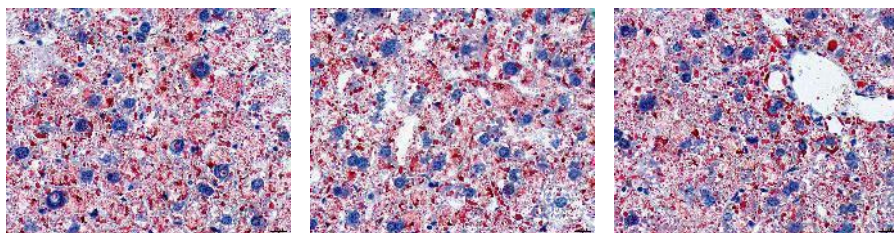

HFD + oe-NC

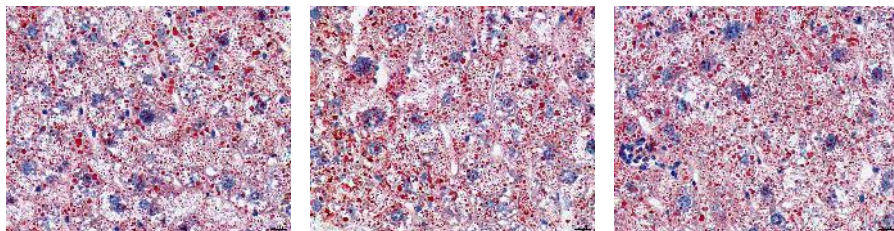

HFD + oe-Foxa2

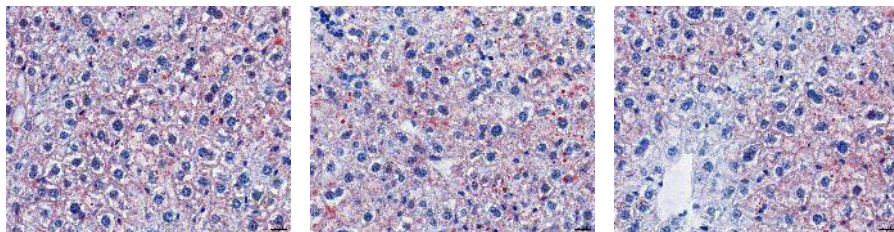

Supplement: Revised_Raw_data.zip [file Revised_Raw_data.zip]

**A**

Foxa2

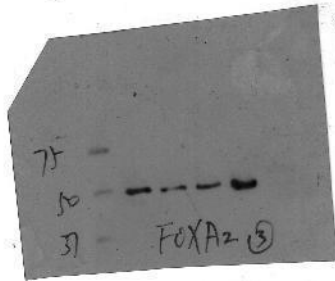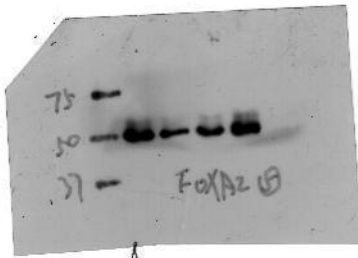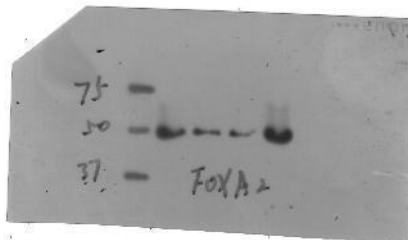

GAPDH

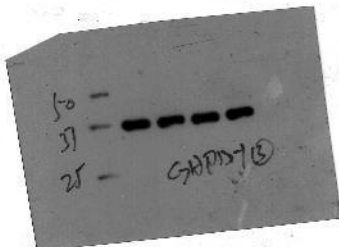

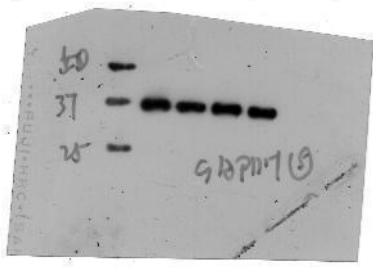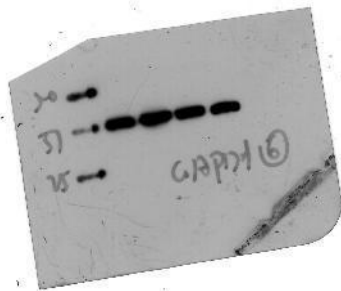

**C**

Control

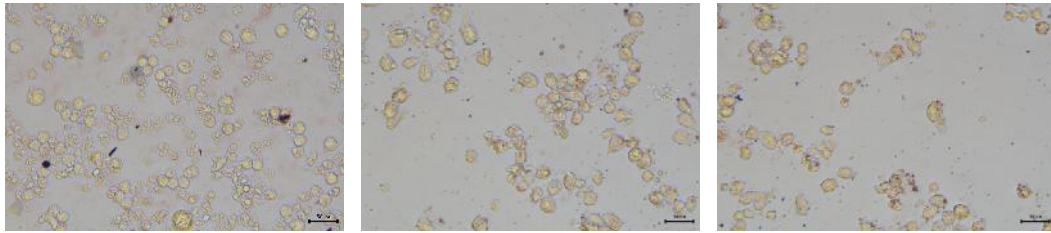

OA

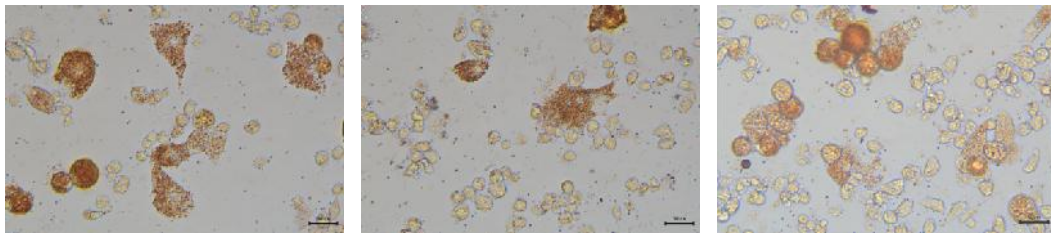

OA + oe-NC

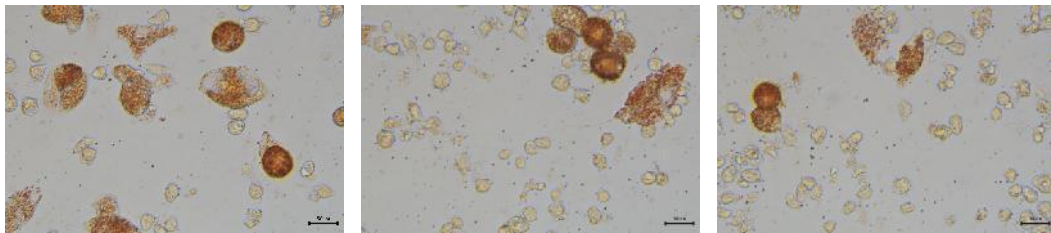

OA + oe-Foxa2

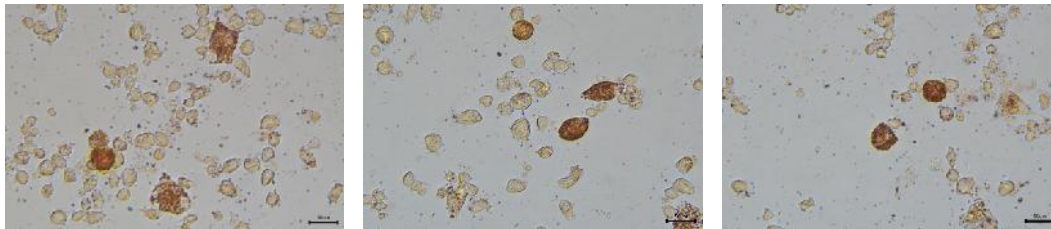

**E**

FAS

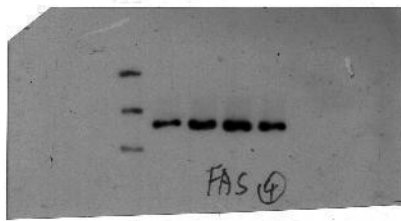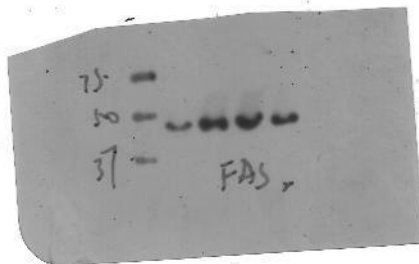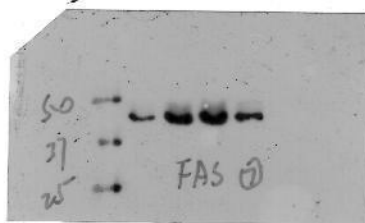

ACC

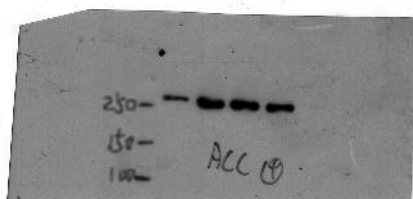

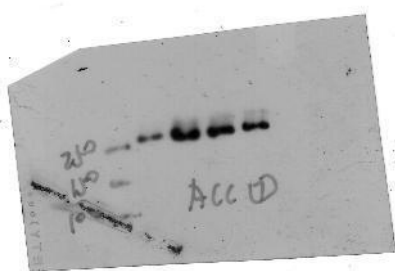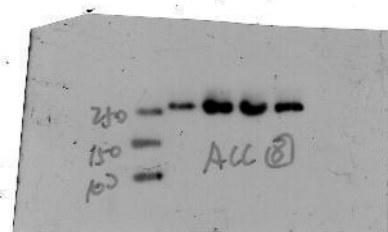

CPT1 $\alpha$

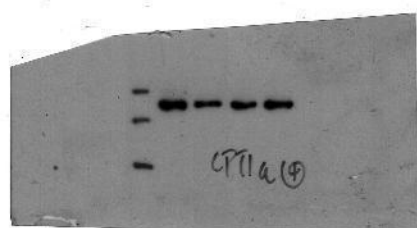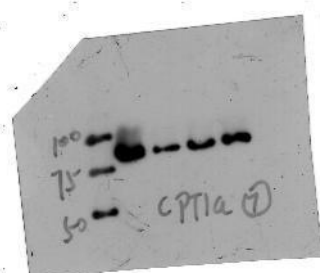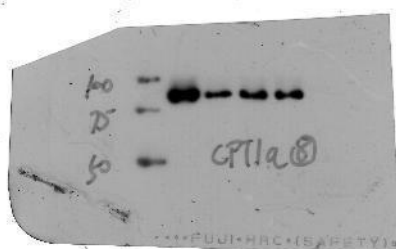

GAPDH

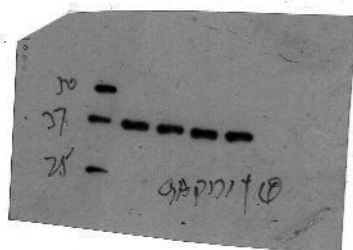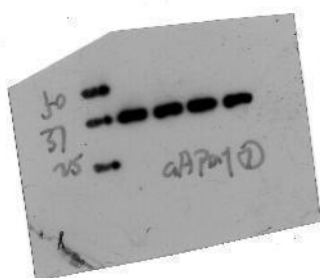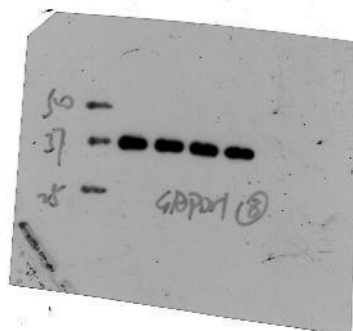

Supplement: Revised_Raw_data.zip [file Revised_Raw_data.zip]

C

Foxa2

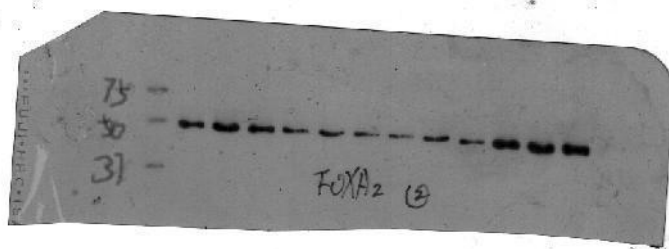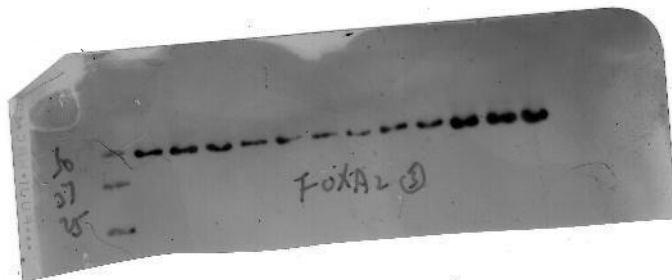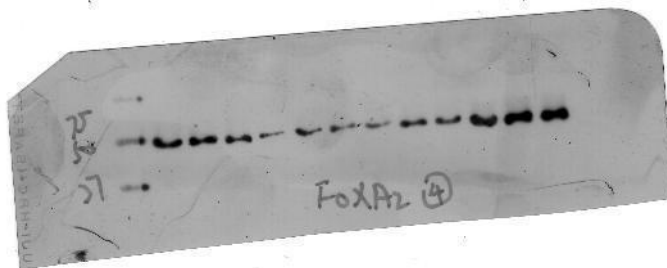

GAPDH

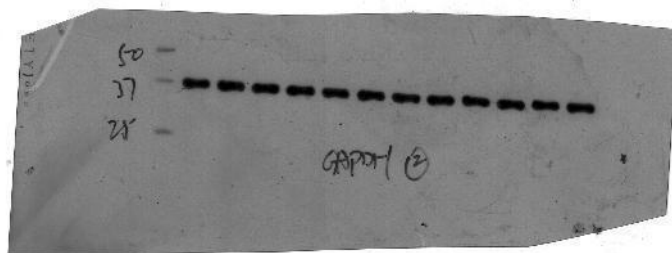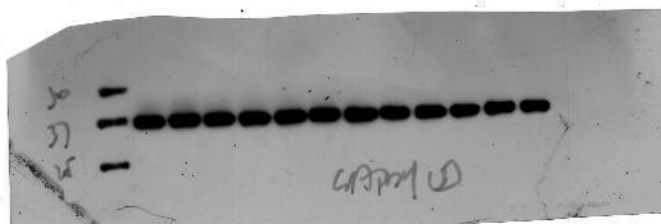

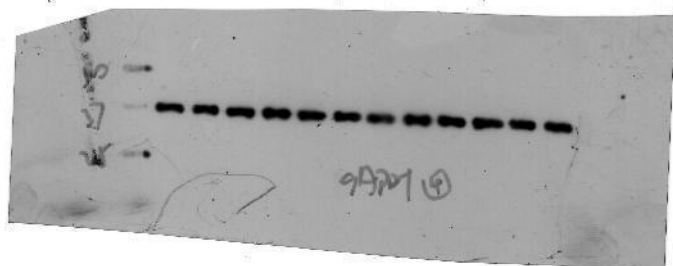

Supplement: Revised_Raw_data.zip [file Revised_Raw_data.zip]

**A**

Foxa2

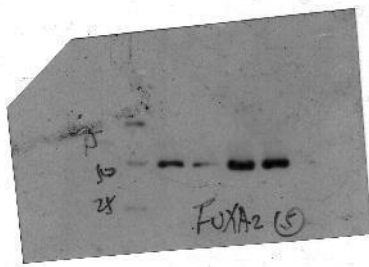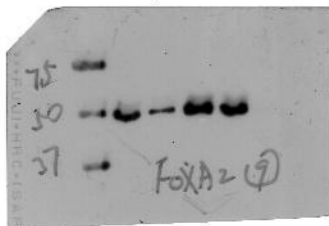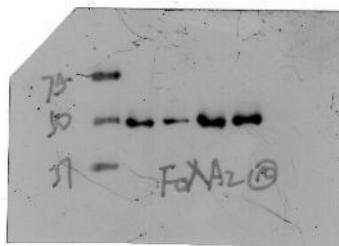

GAPDH

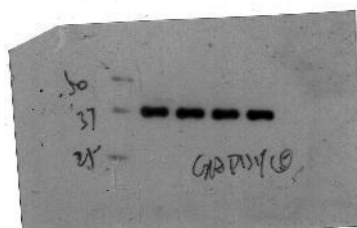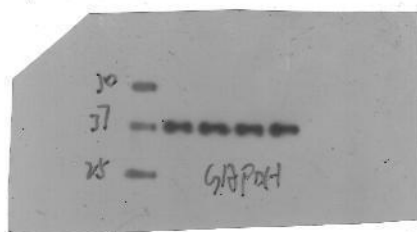

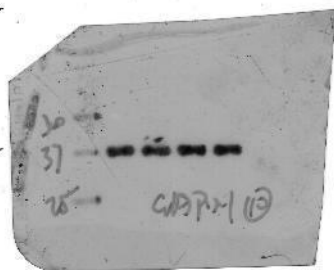

## B

p-NF- $\kappa$ B

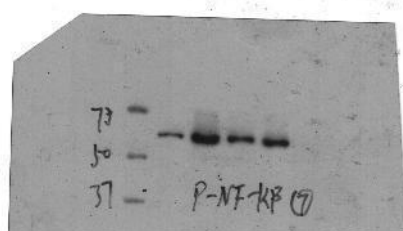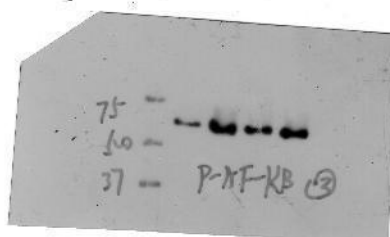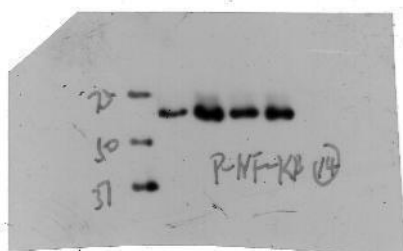

NF- $\kappa$ B

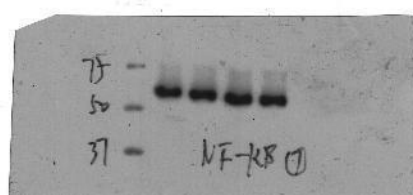

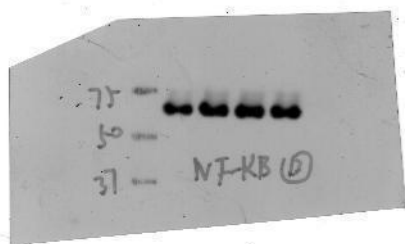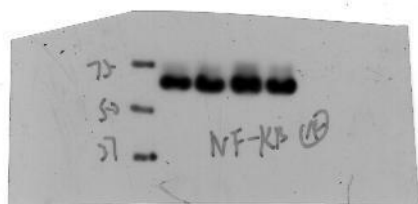

p-IKK

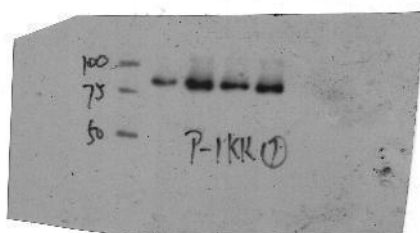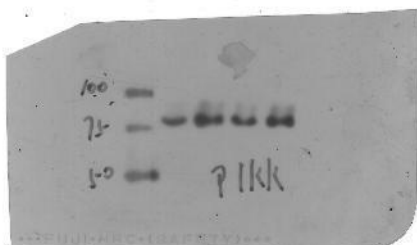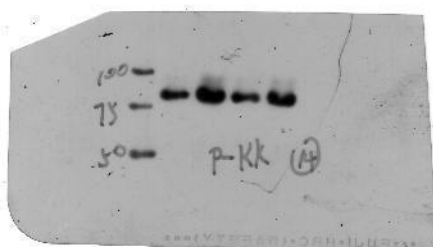

IKK

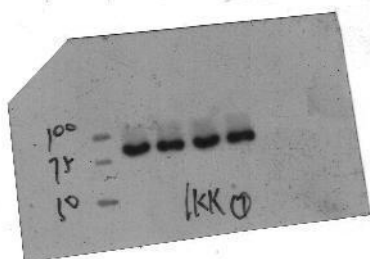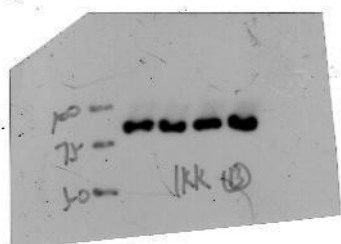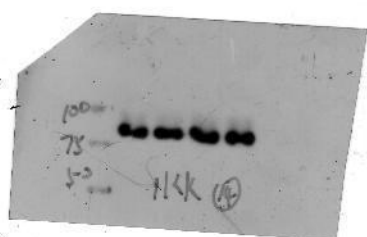

## GAPDH

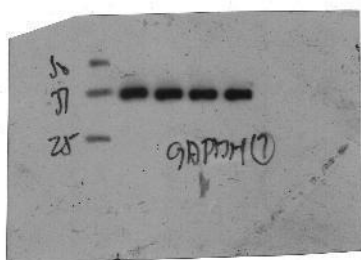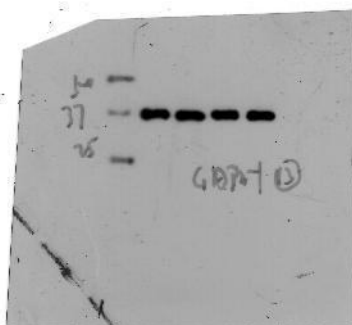

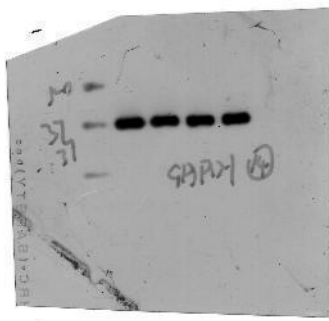

**C**

FAS

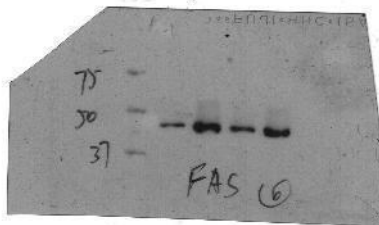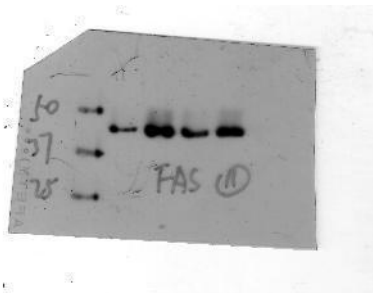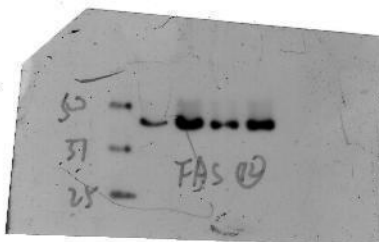

ACC

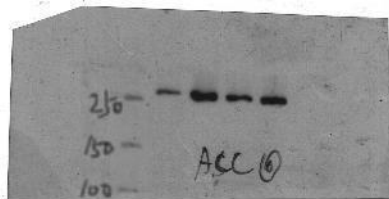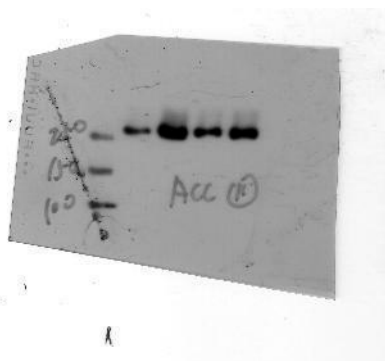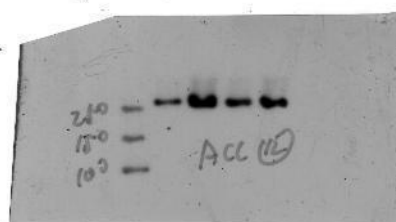

CPT1 $\alpha$

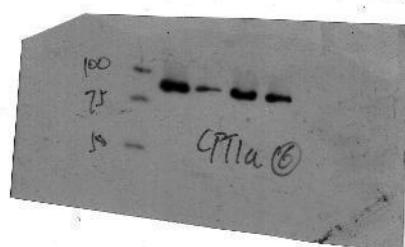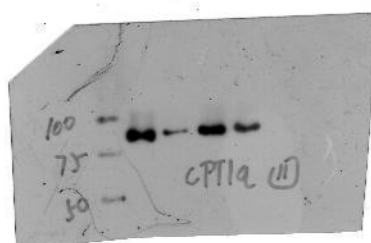

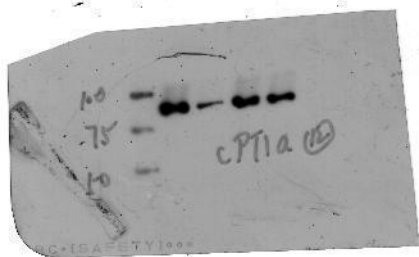

GAPDH

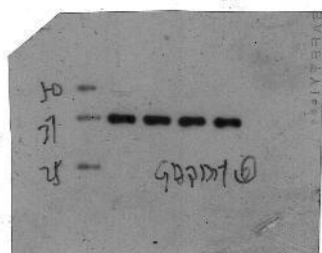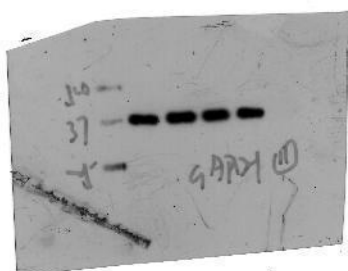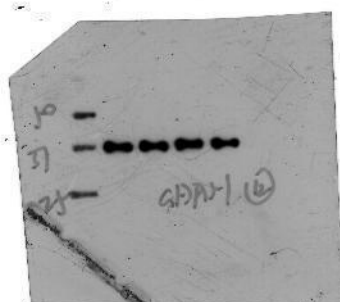

Supplement: Revised_Raw_data.zip [file Revised_Raw_data.zip]

FAS

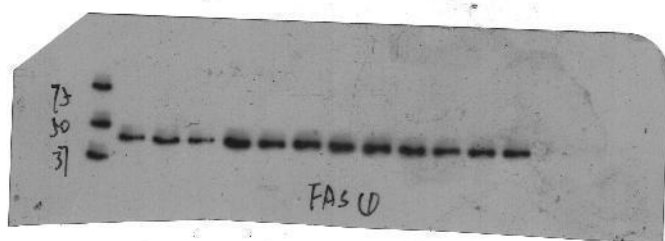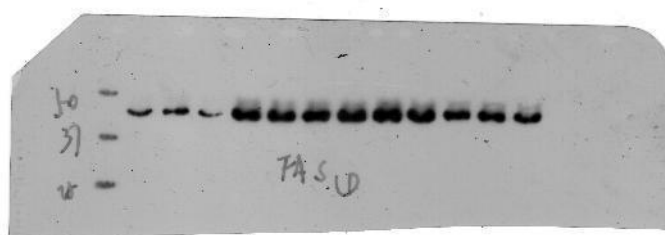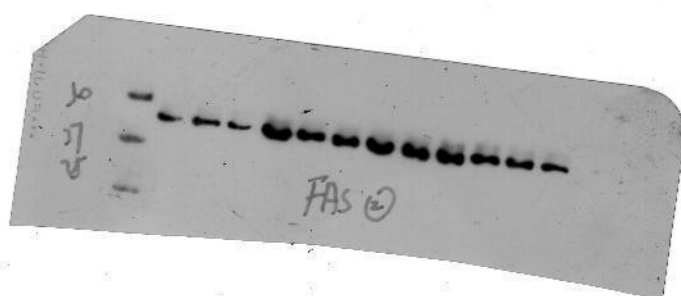

ACC

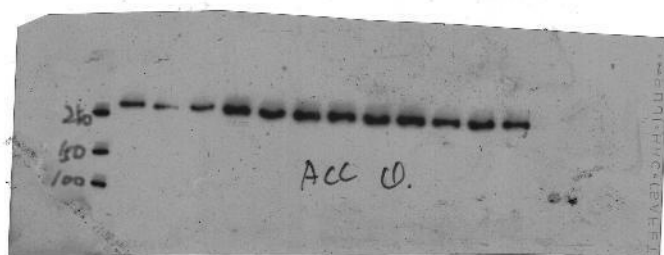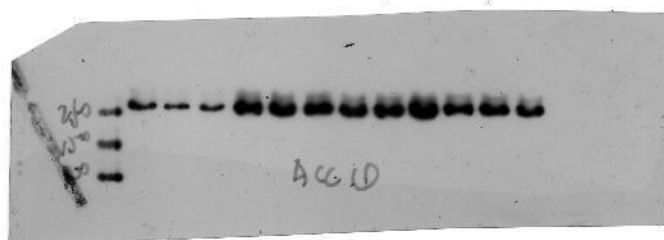

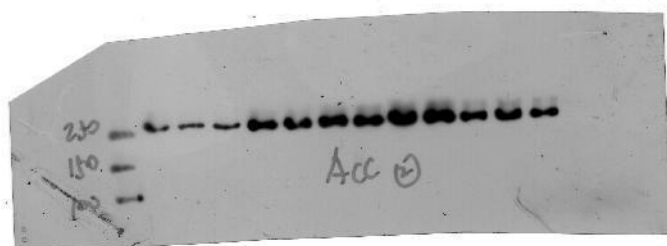

CPT1a

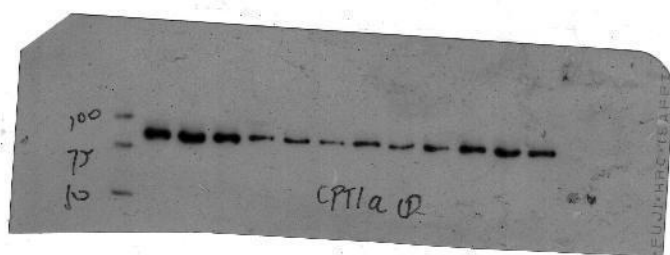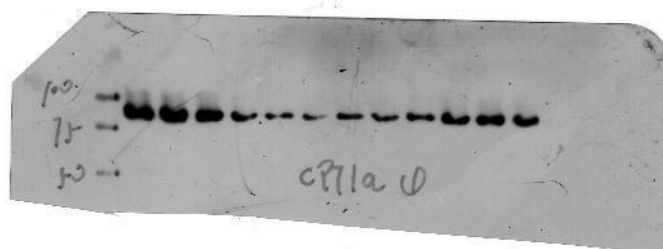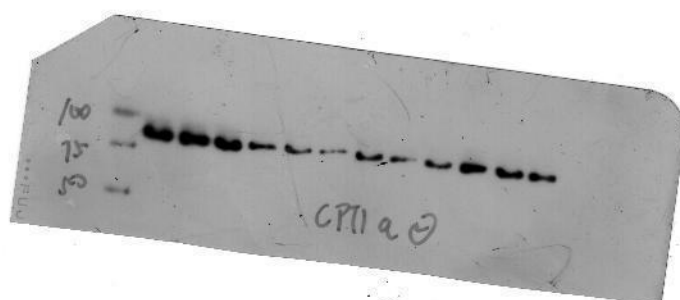

GAPDH

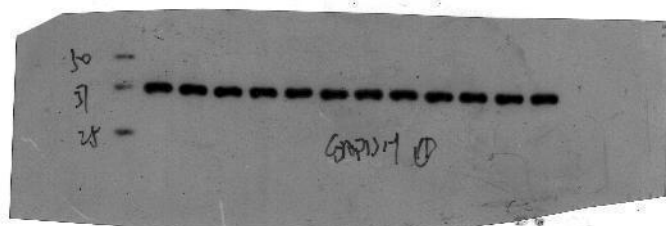

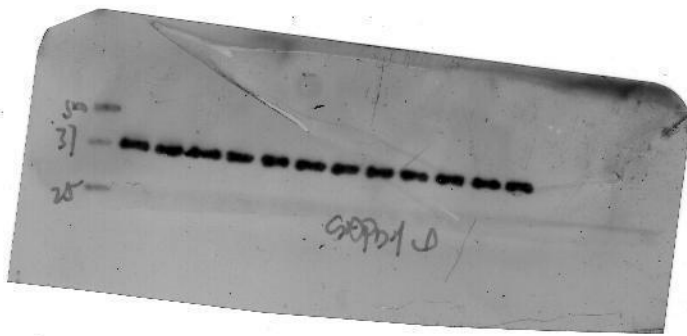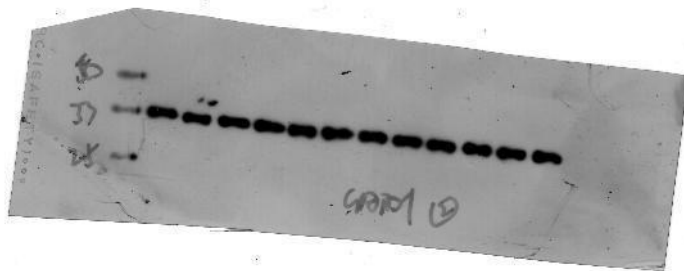

Supplement: Revised_Raw_data.zip [file Revised_Raw_data.zip]
